# Supplementary material for: Metabolic determinants of cellular fitness dependent on mitochondrial reactive oxygen species
Source: PubMed Central journal article supplement — Sci Adv. 2020 Nov 4;6(45):eabb7272. doi: 10.1126/sciadv.abb7272 (PMC7673681; doi:10.1126/sciadv.abb7272), 2020-11-04
Supplement: abb7272_SM.pdf [file abb7272_SM.pdf]

## Supplementary Materials for

### **Metabolic determinants of cellular fitness dependent on mitochondrial reactive oxygen species**

Hyewon Kong, Colleen R. Reczek, Gregory S. McElroy, Elizabeth M. Steinert, Tim Wang,  
David M. Sabatini, Navdeep S. Chandel\*

\*Corresponding author. Email: [nav@northwestern.edu](mailto:nav@northwestern.edu)

Published 4 November 2020, *Sci. Adv.* **6**, eabb7272 (2020)  
DOI: [10.1126/sciadv.abb7272](https://doi.org/10.1126/sciadv.abb7272)

#### **This PDF file includes:**

Figs. S1 to S9  
Table S1

# Supplementary Materials

## Figure S1.

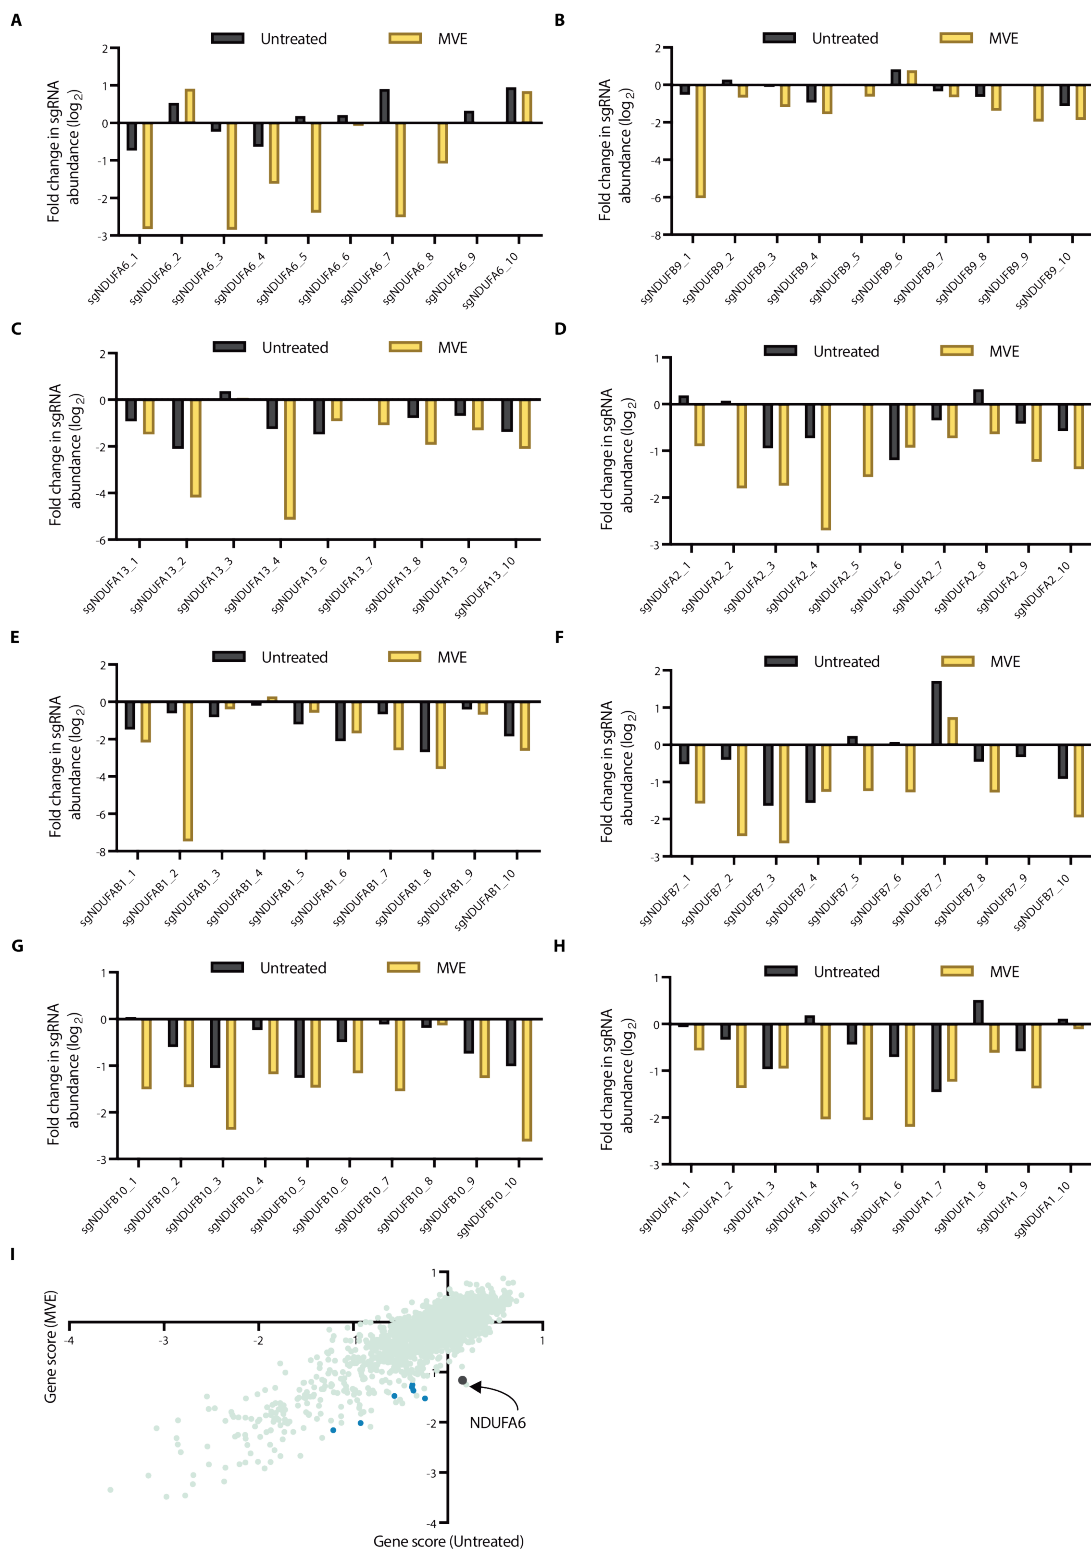

**Fig. S1. A CRISPR-based negative selection screen identifies multiple subunits of mitochondrial complex I to be essential for cellular fitness in the presence of MVE.**

**(A-H)** Changes in the abundance of individual sgRNAs targeting mitochondrial complex I subunit genes; *NDUFA6* (A), *NDUFB9* (B), *NDUFA13* (C), *NDUFA2* (D), *NDUFAB1* (E), *NDUFB7* (F), *NDUFB10* (G), and *NDUFA1* (H), in the presence (yellow) or absence (grey) of MVE. **(I)** Gene scores of all genes targeted by the metabolic sgRNA library in untreated (X-axis) versus MVE-treated (Y-axis) cell populations. Mitochondrial complex I subunit hits, *NDUFA6*, *NDUFB9*, *NDUFA13*, *NDUFA2*, *NDUFAB1*, *NDUFB7*, *NDUFB10*, and *NDUFA1*, are highlighted in blue. Among them, *NDUFA6*, indicated with an arrow, exhibited the largest differential gene score.

**Figure S2.**

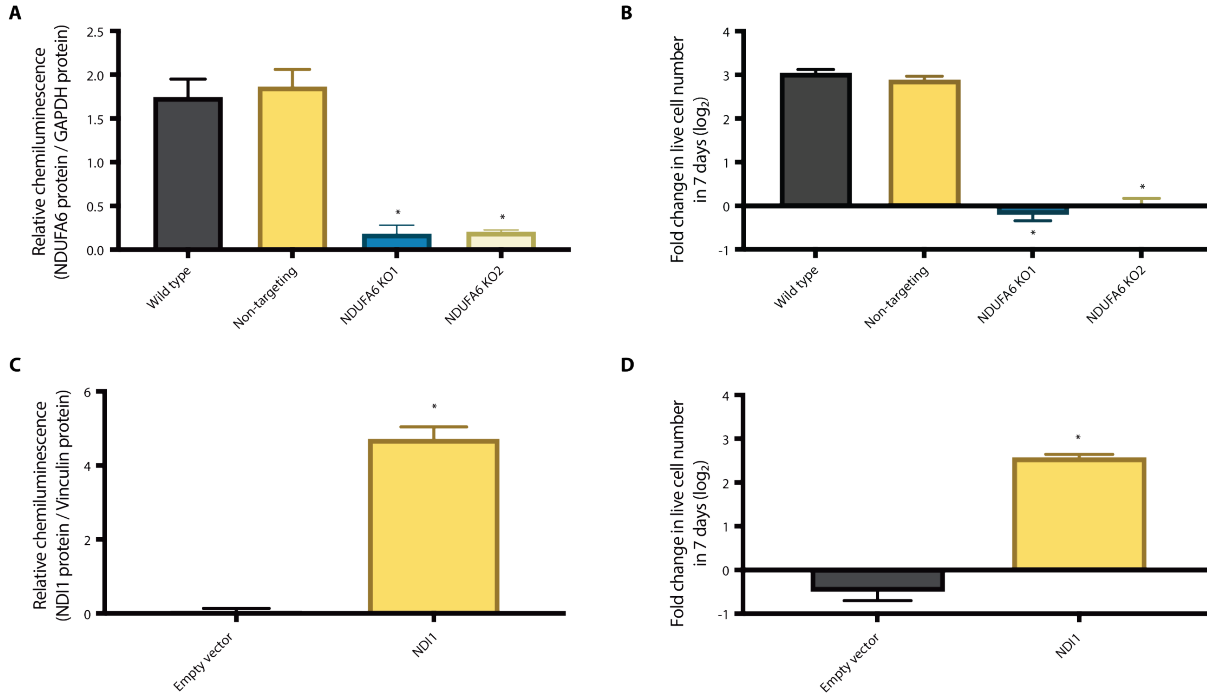

**Fig. S2. CRISPR-mediated deletion of the *NDUFA6* gene impairs mitochondrial complex I function.**

(A) Simple Western analysis of NDUFA6 protein in wild type, non-targeting control, and two NDUFA6-null (NDUFA6 KO1 and KO2) Jurkat cell lines. GAPDH was used as a loading control. (n=3, mean+s.e.m., \*P=0.0003 compared to non-targeting) (B) Wild type, non-targeting control, and two NDUFA6-null (NDUFA6 KO1 and KO2) Jurkat cell lines were cultured in galactose media for 7 days, and the population doublings were assessed. (n=4, mean+s.e.m., \*P<0.0001 compared to non-targeting) (C) Simple Western analysis of NDI1 protein expression in the NDUFA6 KO1 cell line with ectopic expression of either the empty vector or NDI1. Vinculin was used as a loading control. (n=3, mean+s.e.m., \*P=0.0002 compared to empty vector) (D) NDUFA6 KO1 Jurkat cells expressing either empty vector or NDI1 were cultured in galactose media for 7 days, and the population doublings were assessed. (n=4, mean+s.e.m., \*P<0.0001 compared to empty vector)

**Figure S3.**

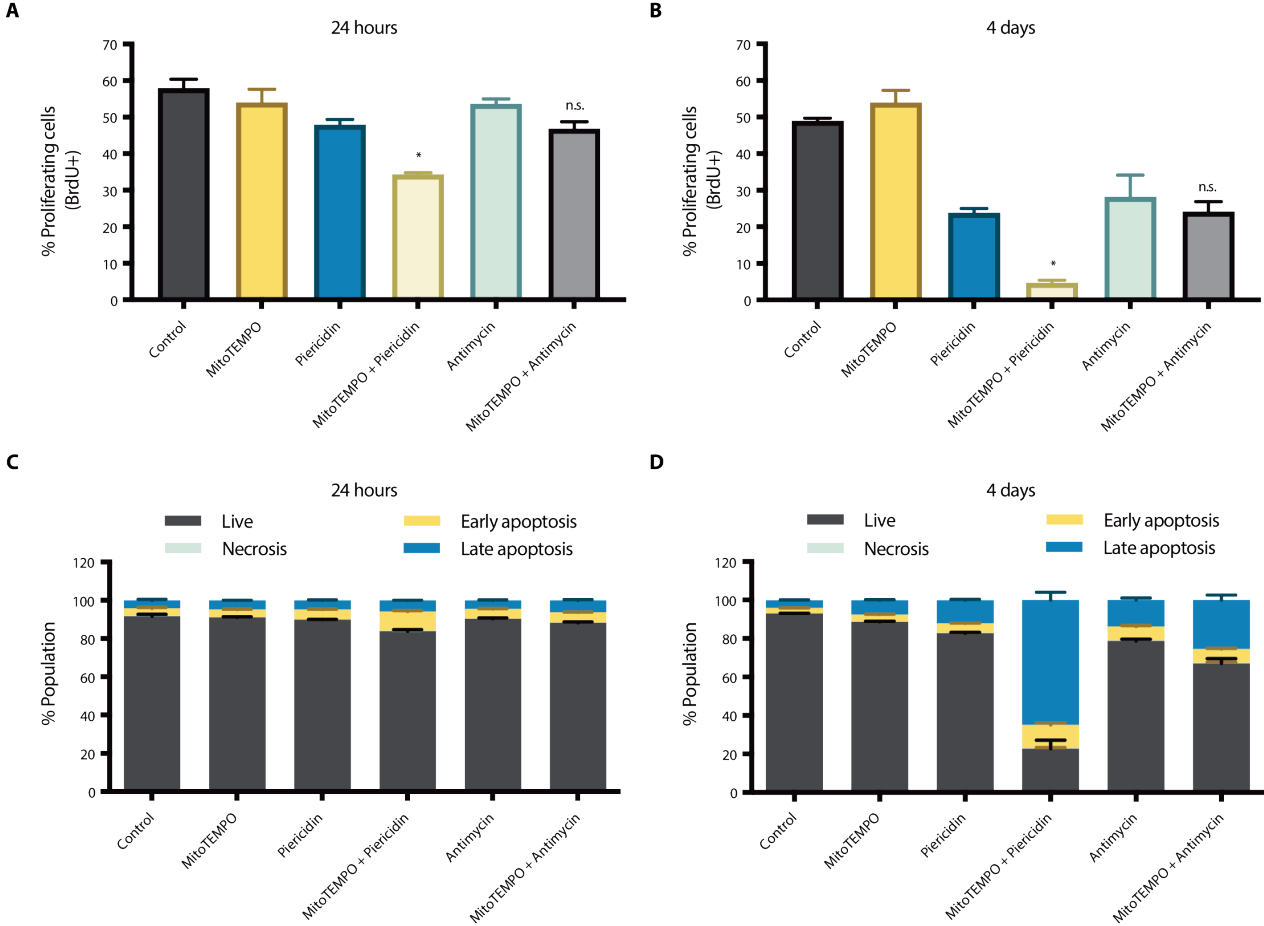

**Fig. S3. Inhibition of mitochondrial complex I, but not mitochondrial complex III, synergizes with a mito-antioxidant to impair cellular fitness.**

(A-B) Jurkat cells supplemented with pyruvate and uridine were treated with 1  $\mu$ M Piericidin or 1  $\mu$ M Antimycin +/- 400  $\mu$ M MitoTEMPO for 24 hours (A) or 4 days (B), and the percentage of BrdU incorporation into the proliferating cell population was measured. (n=3, mean+s.e.m., \*P= 0.0093 (A) or \*P= 0.0114 (B) compared to Piericidin alone, <sup>n.s.</sup>P=0.6588 (A) or <sup>n.s.</sup>P>0.9999 (B) compared to Antimycin alone) (C-D) Jurkat cells supplemented with pyruvate and uridine were treated with 1  $\mu$ M Piericidin or 1  $\mu$ M Antimycin +/- 400  $\mu$ M MitoTEMPO for 24 hours (C) or 4 days (D), and the percentage of Annexin V- and/or propidium iodine (PI)-incorporated apoptotic cell populations were measured. Live: Annexin V negative and PI negative; Necrosis: Annexin V negative and PI positive; Early apoptosis: Annexin V positive and PI negative; Late apoptosis: Annexin V positive and PI positive. (n=4, mean+s.e.m.)

**Figure S4.**

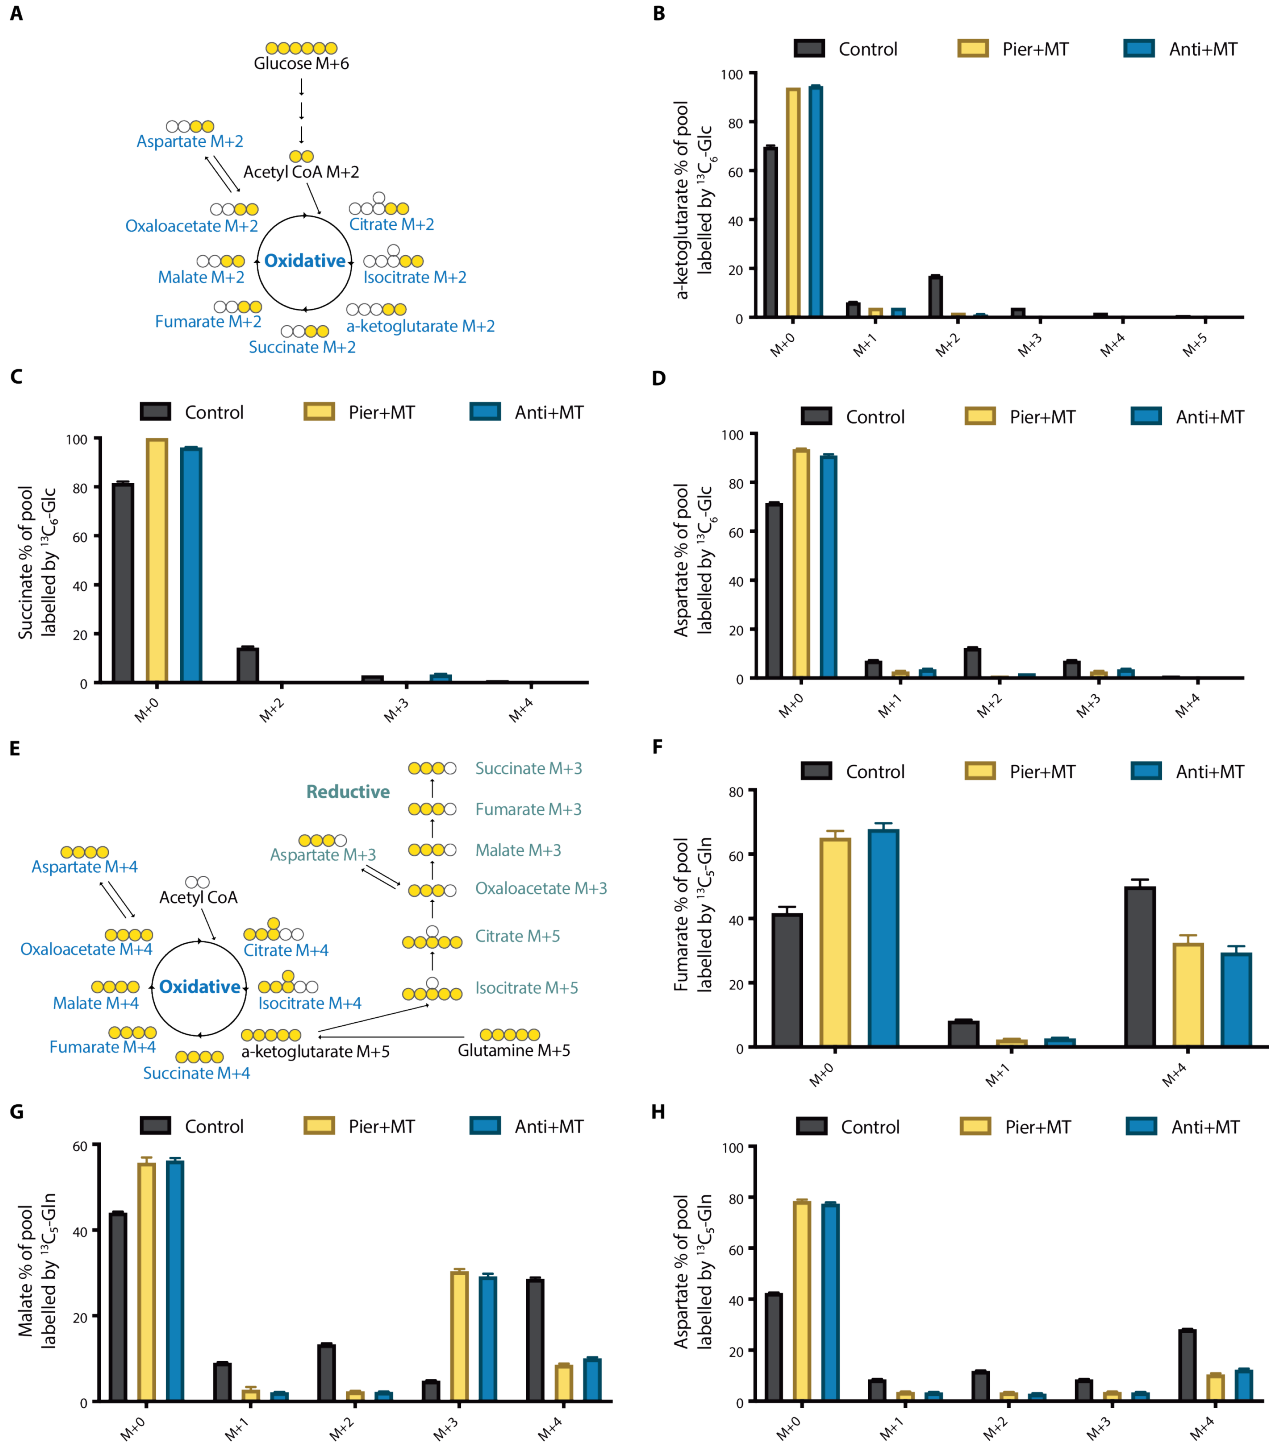

**Fig. S4. Inhibition of mitochondrial complex I or mitochondrial complex III in the presence of a mito-antioxidant induces reductive TCA cycle.**

(A) Schematic representation of the glucose-driven oxidative TCA cycle. Labelled carbons ( $^{13}\text{C}$ ) are indicated in yellow. Oxidative TCA cycle of  $[\text{U-}^{13}\text{C}_6]$ glucose results in M+2 pools of TCA-cycle metabolites, as well as aspartate. (B-D) Jurkat cells treated with vehicle (Control), Piericidin and MitoTEMPO (Pier+MT), or Antimycin and MitoTEMPO (Anti+MT) for 24 hours were labelled for 8 hours with  $[\text{U-}^{13}\text{C}_6]$ glucose, and the percentages of labelled  $\alpha$ -ketoglutarate (B), succinate (C), and aspartate (D) pools were assessed. (n=5, mean+s.e.m.) (C) Schematic representation of the glutamine-driven oxidative (blue) and reductive (green) TCA cycles. Labelled carbons ( $^{13}\text{C}$ ) are indicated in yellow. Metabolism of  $[\text{U-}^{13}\text{C}_5]$ glutamine results in fully labeled M+5  $\alpha$ -ketoglutarate. Oxidative TCA cycle of M+5  $\alpha$ -ketoglutarate generates M+4 pools of TCA-cycle metabolites, as well as aspartate. Reductive TCA cycle of M+5  $\alpha$ -ketoglutarate produces M+5 pool of (iso)citrate, followed by M+3 pool of malate. (F-H) Jurkat cells treated with vehicle (Control), Pier+MT, or Anti+MT for 24 hours were labelled for 8 hours with  $[\text{U-}^{13}\text{C}_5]$ glutamine, and the percentages of labelled fumarate (F), malate (G), and aspartate (H) pools were assessed. (n=5, mean+s.e.m.)



**Figure S5.**

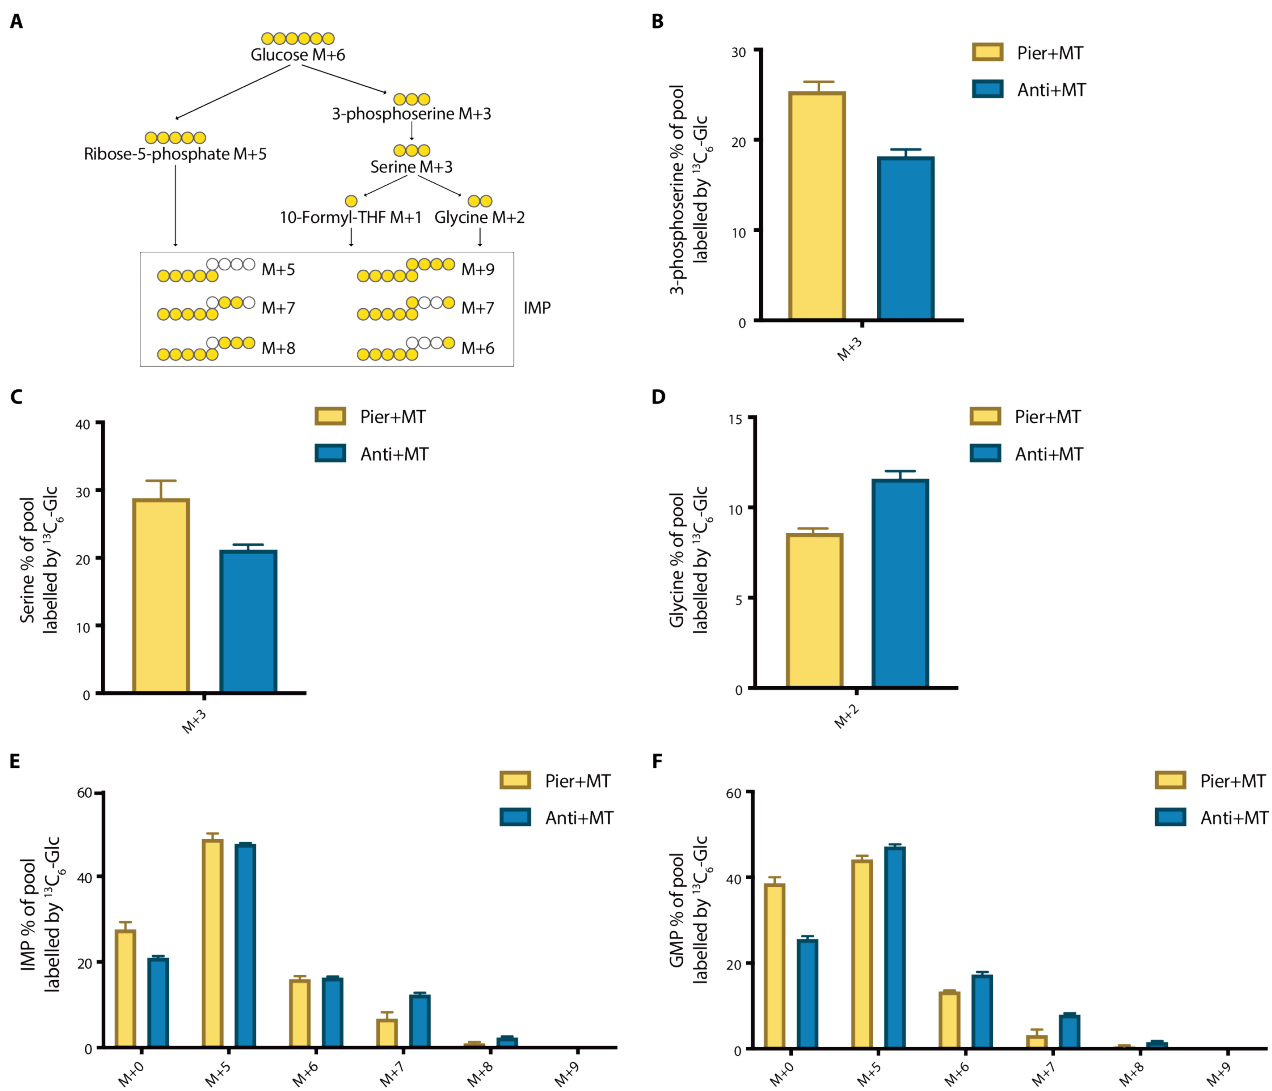

**Fig. S5. Inhibition of mitochondrial complex I in the presence of a mito-antioxidant dysregulates one carbon metabolism and purine biosynthesis.**

(A) Schematic representation of the glucose-driven one carbon metabolism and purine biosynthesis. Labelled carbons ( $^{13}\text{C}$ ) are indicated in yellow. Metabolism of  $[\text{U-}^{13}\text{C}_6]\text{glucose}$  generates M+3 pools of 3-phosphoserine and serine, followed by M+2 pool of glycine. M+2 glycine, when metabolized with fully labelled M+5 ribose-5-phosphate, can produce M+7 pool of purine precursor, IMP. (B-F) Jurkat cells treated with Piericidin and MitoTEMPO (Pier+MT), or Antimycin and MitoTEMPO (Anti+MT) for 24 hours were labelled for 8 hours with  $[\text{U-}^{13}\text{C}_6]\text{glucose}$ . The percentages of M+3 3-phosphoserine (B), M+3 serine (C), and M+2 glycine (D), labelled by glucose-driven one carbon metabolism were examined. Additionally, the percentages of labelled IMP purine precursor (E) and GMP purine (F) pools were assessed. (n=5, mean+s.e.m.).

**Figure S6.**

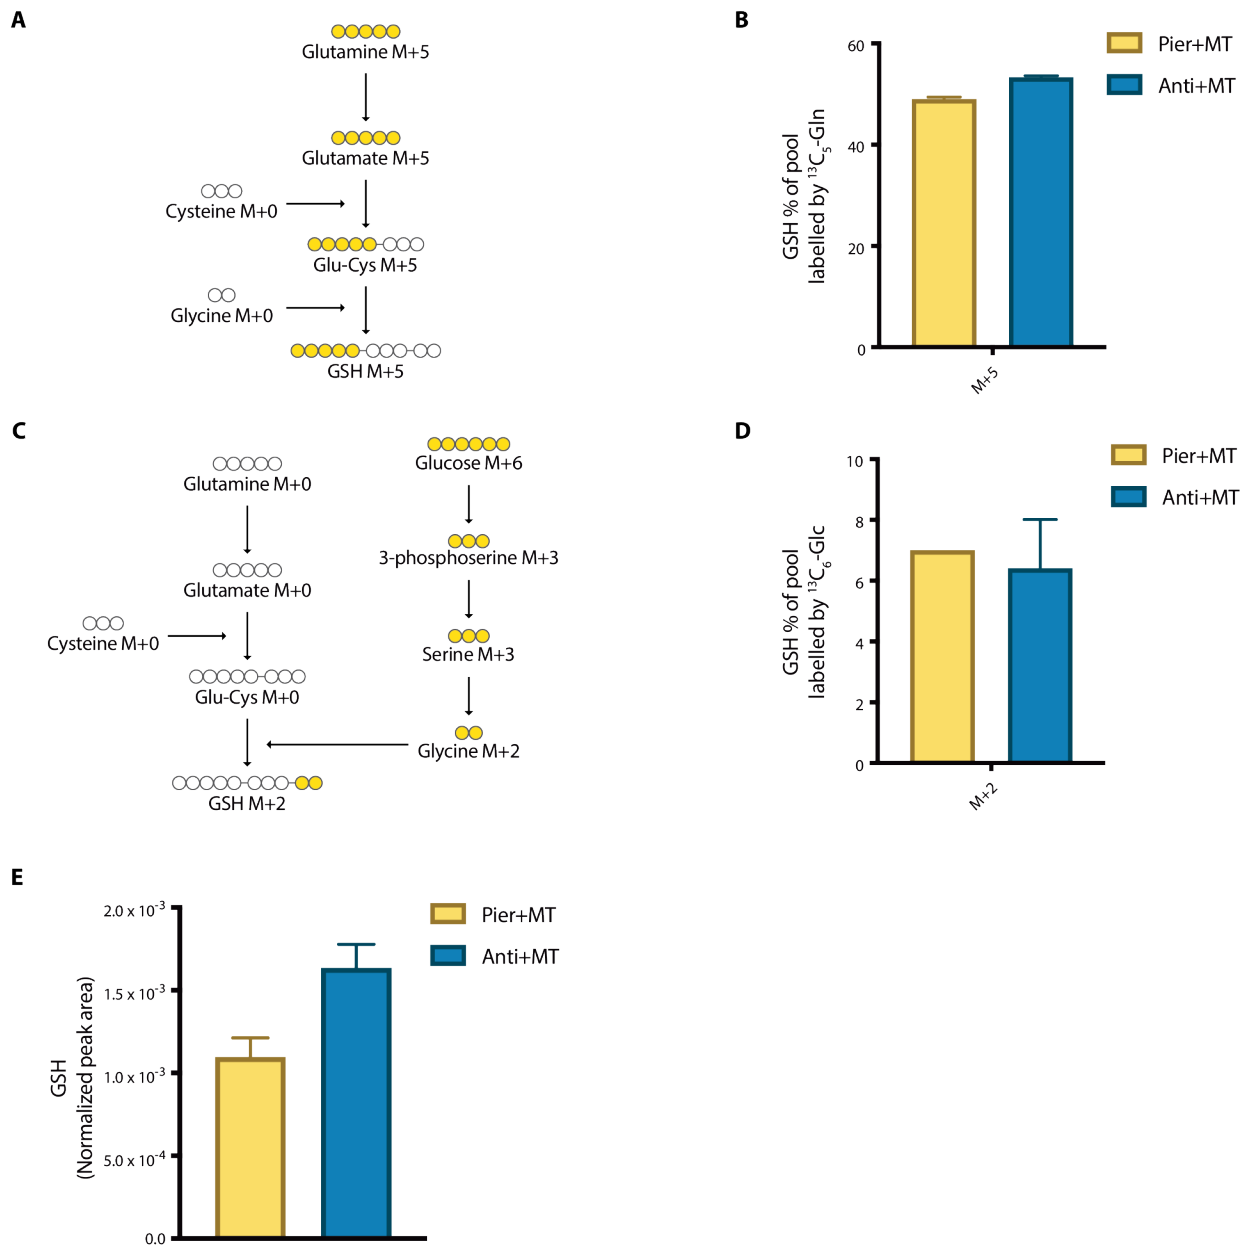

**Fig. S6. Glutathione (GSH) content and synthesis in cells treated with Piericidin or Antimycin in combination with MitoTEMPO.**

(A) Schematic representation of the glutamine-derived GSH synthesis. Labelled carbons ( $^{13}\text{C}$ ) are indicated in yellow. Metabolism of  $[\text{U-}^{13}\text{C}_5]\text{glutamine}$  results in M+5 pool of GSH. (B) Jurkat cells treated with Piericidin and MitoTEMPO (Pier+MT), or Antimycin and MitoTEMPO (Anti+MT) for 24 hours were labelled for 8 hours with  $[\text{U-}^{13}\text{C}_5]\text{glutamine}$ , and the percentage of M+5 labelled GSH was assessed. (n=5, mean+s.e.m.) (C) Schematic representation of the glucose-derived GSH synthesis. Labelled carbons ( $^{13}\text{C}$ ) are indicated in yellow. Metabolism of  $[\text{U-}^{13}\text{C}_6]\text{glucose}$  results in M+2 pool of GSH. (D) Jurkat cells treated with Pier+MT or Anti+MT for 24 hours were labelled for 8 hours with  $[\text{U-}^{13}\text{C}_6]\text{glucose}$ , and the percentage of M+2 labelled GSH was assessed. (n=5, mean+s.e.m.) (E) GSH levels in Jurkat cells treated with Pier+MT or Anti+MT for 24 hours. (n=6, mean+s.e.m.)

**Figure S7.**

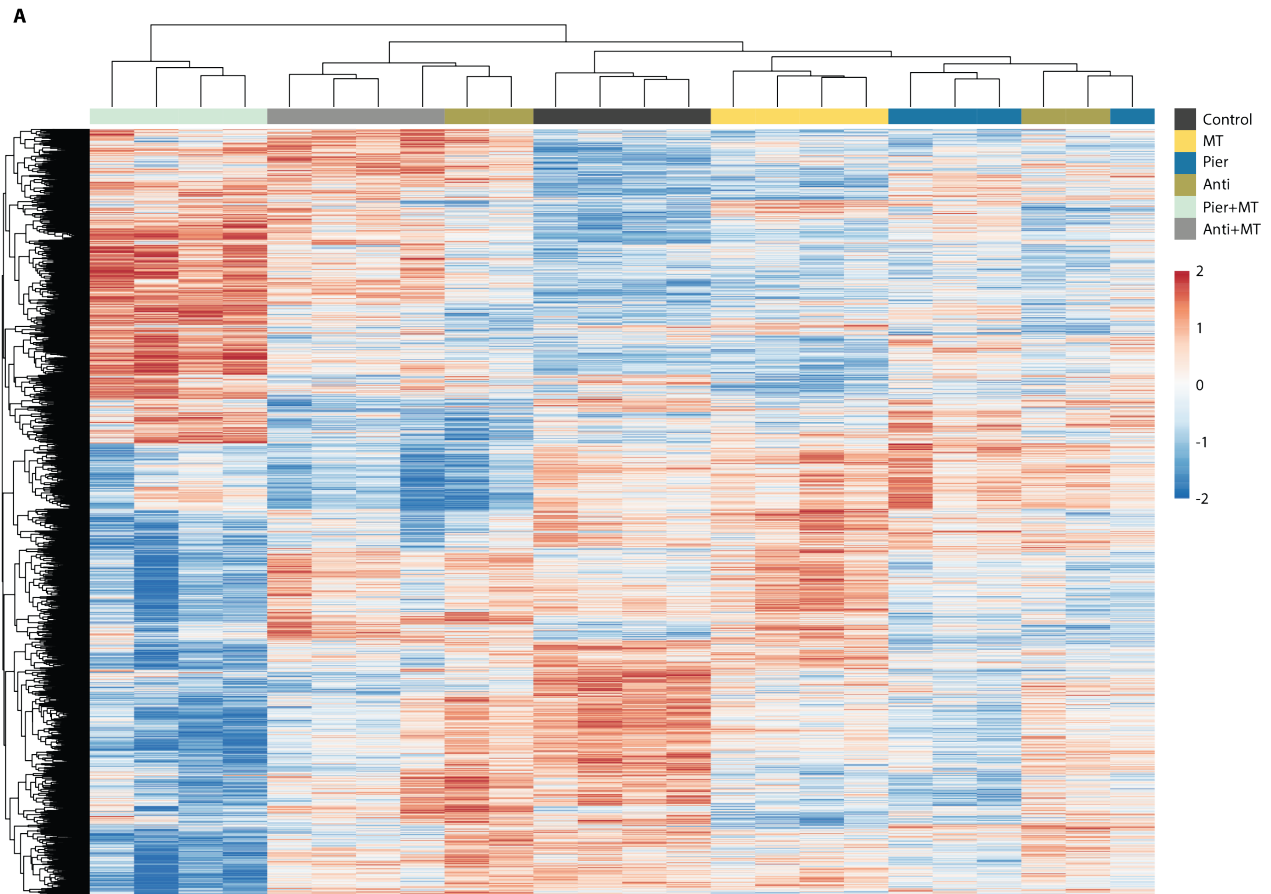

**Fig. S7. Combination of mitochondrial complex I inhibition and a mito-antioxidant induces a unique transcriptomic signature.**

**(A)** Heatmap of unsupervised clustering, representing RNA transcripts whose abundances were significantly different among Jurkat cells treated with vehicle (Control), MitoTEMPO (MT), Piericidin (Pier), Antimycin (Anti), Piericidin and MitoTEMPO (Pier+MT), or Antimycin and MitoTEMPO (Anti+MT) for 24 hours. The relative abundance of each transcript is depicted as z-score across rows. (Red: high; Blue: low) (n=4, FDR $\leq$ 0.05)

Figure S8.

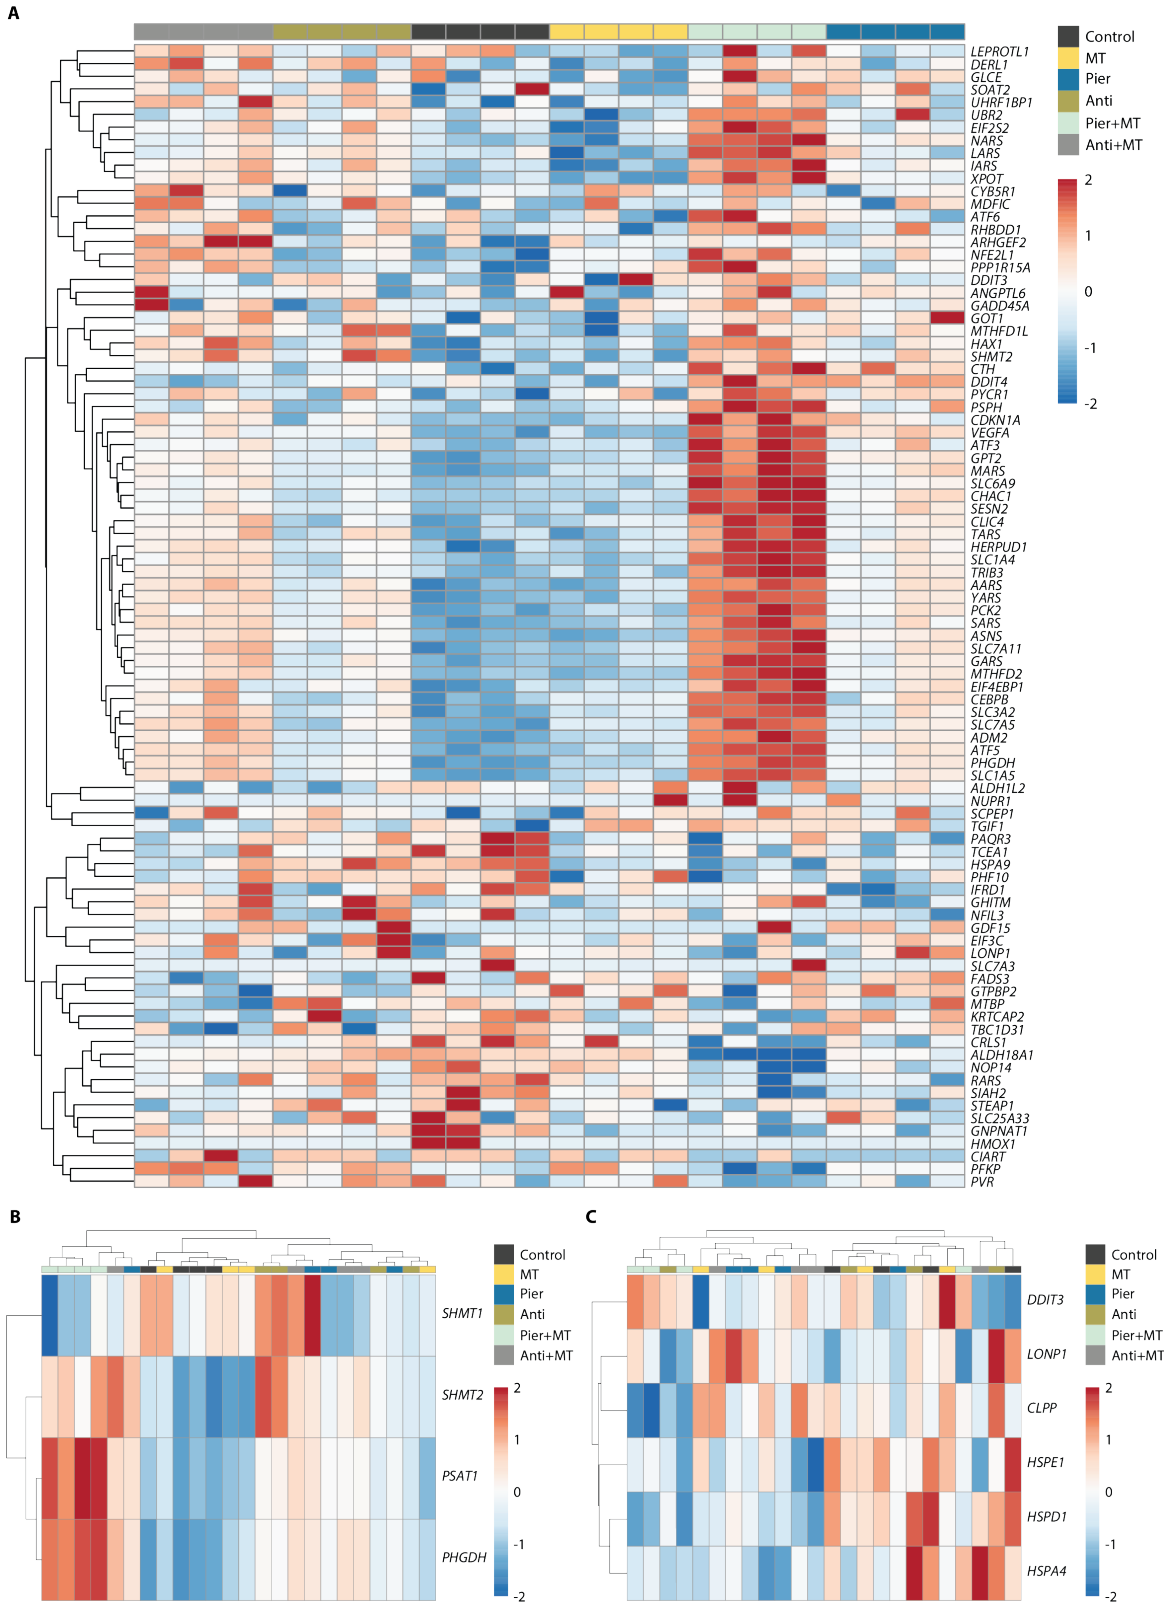

**Fig. S8. ISR-associated genes are largely upregulated in Jurkat cells treated with Piericidin and MitoTEMPO.**

(A) Heatmap of all ISR signature genes in Jurkat cells treated with vehicle (Control), MitoTempo (MT), Piericidin (Pier), Antimycin (Anti), Piericidin and MitoTEMPO (Pier+MT), or Antimycin and MitoTEMPO (Anti+MT) for 24 hours. The relative abundance of each transcript is depicted as z-score across rows. (Red: high; Blue: low) (n=4) (B-C) Heatmap of unsupervised clustering, representing one carbon metabolism (B) or canonical mitochondrial UPR (UPR<sup>mt</sup>) (C) associated genes in Jurkat cells treated with vehicle (Control), MT, Pier, Anti, Pier+MT, or Anti+MT for 24 hours. The relative abundance of each transcript is depicted as z-score across rows. (Red: high; Blue: low) (n=4)





**Fig. S9. Combination of mitochondrial complex I inhibition and a mito-antioxidant diminishes percentage of leukemic cells *in vivo*.**

(A) Weight of spleens from T-ALL recipients treated with vehicle (Control), Phenformin, MitoTEMPO, or Phenformin+MitoTempo for 15 days. (Control: n=11; Phenformin: n=12; MitoTEMPO: n=12; Phenformin+MitoTEMPO: n=13., mean±s.e.m., \*P=0.0307 (Phenformin) or \*P<0.0001 (Phenformin+MitoTEMPO) compared to control, <sup>n.s.</sup>P value is reported in the material and methods) **(B, C, D)** Percentage of GFP+ T-ALL cells in the spleen (B), bone marrow (C), or peripheral lymph nodes (D) from T-ALL recipients treated with vehicle (Control), Phenformin, MitoTEMPO, or Phenformin+MitoTempo for 15 days. (Control: n=11; Phenformin: n=12; MitoTEMPO: n=12; Phenformin+MitoTEMPO: n=13., mean±s.e.m., \*P=0.0195 (B); \*P=0.0382 (C; Phenformin); \*P<0.0001 (C; Phenformin+MitoTEMPO); \*P<0.0001 (D) compared to control, <sup>n.s.</sup>P values are reported in the material and methods)

**Table S1. Human integrated stress response (ISR) associated genes**

| <b>group</b> | <b>gene_id</b>  | <b>symbol</b> |
|--------------|-----------------|---------------|
| gene.clic    | ENSG00000090861 | AARS          |
| gene.clic    | ENSG00000128165 | ADM2          |
| gene.clic    | ENSG00000059573 | ALDH18A1      |
| gene.clic    | ENSG00000136010 | ALDH1L2       |
| gene.clic    | ENSG00000130812 | ANGPTL6       |
| gene.clic    | ENSG00000116584 | ARHGEF2       |
| gene.clic    | ENSG00000070669 | ASNS          |
| gene.clic    | ENSG00000162772 | ATF3          |
| gene.clic    | ENSG00000169136 | ATF5          |
| gene.clic    | ENSG00000118217 | ATF6          |
| gene.clic    | ENSG00000124762 | CDKN1A        |
| gene.clic    | ENSG00000172216 | CEBPB         |
| gene.clic    | ENSG00000128965 | CHAC1         |
| gene.clic    | ENSG00000159208 | CIART         |
| gene.clic    | ENSG00000169504 | CLIC4         |
| gene.clic    | ENSG00000182372 | CLN8          |
| gene.clic    | ENSG00000088766 | CRLS1         |

|                  |                        |                 |
|------------------|------------------------|-----------------|
| <b>gene.clic</b> | <b>ENSG00000116761</b> | <b>CTH</b>      |
| <b>gene.clic</b> | <b>ENSG00000159348</b> | <b>CYB5R1</b>   |
| <b>gene.clic</b> | <b>ENSG00000175197</b> | <b>DDIT3</b>    |
| <b>gene.clic</b> | <b>ENSG00000168209</b> | <b>DDIT4</b>    |
| <b>gene.clic</b> | <b>ENSG00000136986</b> | <b>DERL1</b>    |
| <b>gene.clic</b> | <b>ENSG00000125977</b> | <b>EIF2S2</b>   |
| <b>gene.clic</b> | <b>ENSG00000184110</b> | <b>EIF3C</b>    |
| <b>gene.clic</b> | <b>ENSG00000187840</b> | <b>EIF4EBP1</b> |
| <b>gene.clic</b> | <b>ENSG00000221968</b> | <b>FADS3</b>    |
| <b>gene.clic</b> | <b>ENSG00000135842</b> | <b>FAM129A</b>  |
| <b>gene.clic</b> | <b>ENSG00000116717</b> | <b>GADD45A</b>  |
| <b>gene.clic</b> | <b>ENSG00000106105</b> | <b>GARS</b>     |
| <b>gene.clic</b> | <b>ENSG00000130513</b> | <b>GDF15</b>    |
| <b>gene.clic</b> | <b>ENSG00000165678</b> | <b>GHITM</b>    |
| <b>gene.clic</b> | <b>ENSG00000138604</b> | <b>GLCE</b>     |
| <b>gene.clic</b> | <b>ENSG00000100522</b> | <b>GNPNAT1</b>  |
| <b>gene.clic</b> | <b>ENSG00000120053</b> | <b>GOT1</b>     |
| <b>gene.clic</b> | <b>ENSG00000166123</b> | <b>GPT2</b>     |

|                  |                        |                 |
|------------------|------------------------|-----------------|
| <b>gene.clic</b> | <b>ENSG00000172432</b> | <b>GTPBP2</b>   |
| <b>gene.clic</b> | <b>ENSG00000143575</b> | <b>HAX1</b>     |
| <b>gene.clic</b> | <b>ENSG00000051108</b> | <b>HERPUD1</b>  |
| <b>gene.clic</b> | <b>ENSG00000100292</b> | <b>HMOX1</b>    |
| <b>gene.clic</b> | <b>ENSG00000113013</b> | <b>HSPA9</b>    |
| <b>gene.clic</b> | <b>ENSG00000196305</b> | <b>IARS</b>     |
| <b>gene.clic</b> | <b>ENSG00000006652</b> | <b>IFRD1</b>    |
| <b>gene.clic</b> | <b>ENSG00000163463</b> | <b>KRTCAP2</b>  |
| <b>gene.clic</b> | <b>ENSG00000133706</b> | <b>LARS</b>     |
| <b>gene.clic</b> | <b>ENSG00000104660</b> | <b>LEPROTL1</b> |
| <b>gene.clic</b> | <b>ENSG00000196365</b> | <b>LONP1</b>    |
| <b>gene.clic</b> | <b>ENSG00000166986</b> | <b>MARS</b>     |
| <b>gene.clic</b> | <b>ENSG00000135272</b> | <b>MDFIC</b>    |
| <b>gene.clic</b> | <b>ENSG00000172167</b> | <b>MTBP</b>     |
| <b>gene.clic</b> | <b>ENSG00000120254</b> | <b>MTHFD1L</b>  |
| <b>gene.clic</b> | <b>ENSG00000065911</b> | <b>MTHFD2</b>   |
| <b>gene.clic</b> | <b>ENSG00000134440</b> | <b>NARS</b>     |
| <b>gene.clic</b> | <b>ENSG00000082641</b> | <b>NFE2L1</b>   |

|                  |                        |                 |
|------------------|------------------------|-----------------|
| <b>gene.clic</b> | <b>ENSG00000165030</b> | <b>NFIL3</b>    |
| <b>gene.clic</b> | <b>ENSG00000087269</b> | <b>NOP14</b>    |
| <b>gene.clic</b> | <b>ENSG00000176046</b> | <b>NUPR1</b>    |
| <b>gene.clic</b> | <b>ENSG00000089723</b> | <b>OTUB2</b>    |
| <b>gene.clic</b> | <b>ENSG00000163291</b> | <b>PAQR3</b>    |
| <b>gene.clic</b> | <b>ENSG00000100889</b> | <b>PCK2</b>     |
| <b>gene.clic</b> | <b>ENSG00000067057</b> | <b>PFKP</b>     |
| <b>gene.clic</b> | <b>ENSG00000130024</b> | <b>PHF10</b>    |
| <b>gene.clic</b> | <b>ENSG00000092621</b> | <b>PHGDH</b>    |
| <b>gene.clic</b> | <b>ENSG00000087074</b> | <b>PPP1R15A</b> |
| <b>gene.clic</b> | <b>ENSG00000146733</b> | <b>PSPH</b>     |
| <b>gene.clic</b> | <b>ENSG00000073008</b> | <b>PVR</b>      |
| <b>gene.clic</b> | <b>ENSG00000183010</b> | <b>PYCR1</b>    |
| <b>gene.clic</b> | <b>ENSG00000113643</b> | <b>RARS</b>     |
| <b>gene.clic</b> | <b>ENSG00000144468</b> | <b>RHBDD1</b>   |
| <b>gene.clic</b> | <b>ENSG00000031698</b> | <b>SARS</b>     |
| <b>gene.clic</b> | <b>ENSG00000121064</b> | <b>SCPEP1</b>   |
| <b>gene.clic</b> | <b>ENSG00000130766</b> | <b>SESN2</b>    |

|                  |                        |                 |
|------------------|------------------------|-----------------|
| <b>gene.clic</b> | <b>ENSG00000182199</b> | <b>SHMT2</b>    |
| <b>gene.clic</b> | <b>ENSG00000181788</b> | <b>SIAH2</b>    |
| <b>gene.clic</b> | <b>ENSG00000115902</b> | <b>SLC1A4</b>   |
| <b>gene.clic</b> | <b>ENSG00000105281</b> | <b>SLC1A5</b>   |
| <b>gene.clic</b> | <b>ENSG00000171612</b> | <b>SLC25A33</b> |
| <b>gene.clic</b> | <b>ENSG00000168003</b> | <b>SLC3A2</b>   |
| <b>gene.clic</b> | <b>ENSG00000196517</b> | <b>SLC6A9</b>   |
| <b>gene.clic</b> | <b>ENSG00000151012</b> | <b>SLC7A11</b>  |
| <b>gene.clic</b> | <b>ENSG00000165349</b> | <b>SLC7A3</b>   |
| <b>gene.clic</b> | <b>ENSG00000103257</b> | <b>SLC7A5</b>   |
| <b>gene.clic</b> | <b>ENSG00000167780</b> | <b>SOAT2</b>    |
| <b>gene.clic</b> | <b>ENSG00000164647</b> | <b>STEAP1</b>   |
| <b>gene.clic</b> | <b>ENSG00000113407</b> | <b>TARS</b>     |
| <b>gene.clic</b> | <b>ENSG00000156787</b> | <b>TBC1D31</b>  |
| <b>gene.clic</b> | <b>ENSG00000187735</b> | <b>TCEA1</b>    |
| <b>gene.clic</b> | <b>ENSG00000177426</b> | <b>TGIF1</b>    |
| <b>gene.clic</b> | <b>ENSG00000101255</b> | <b>TRIB3</b>    |
| <b>gene.clic</b> | <b>ENSG00000024048</b> | <b>UBR2</b>     |

|                  |                        |                 |
|------------------|------------------------|-----------------|
| <b>gene.clic</b> | <b>ENSG00000065060</b> | <b>UHRF1BP1</b> |
| <b>gene.clic</b> | <b>ENSG00000112715</b> | <b>VEGFA</b>    |
| <b>gene.clic</b> | <b>ENSG00000184575</b> | <b>XPOT</b>     |
| <b>gene.clic</b> | <b>ENSG00000134684</b> | <b>YARS</b>     |
